# Supplementary material for: Novel missense variants of TAF1 are associated with infantile epileptic spasms and impaired neuronal excitability and development
Source: Research Square preprint supplement (doi:10.21203/rs.3.rs-7222390/v1), 2025-07-29
Supplement: Supplementary file 1 [file 37537de1478ebde0ad93c23f.docx]

**Novel missense variants of *TAF1* are associated with infantile epileptic spasms and impaired** **neuronal** **excitability and development**

Hui Xiao1, Changning Xie1, Pan Peng1, Xiaoyuan Ni1, Leilei Mao*1,2, Jing Peng*1,3

1 Department of Pediatrics, Xiangya Hospital, Central South University, Xiangya Road 87, Changsha, 410008, Hunan, China.

2 Department of Pediatrics, Xiangya Hospital, Central South University, Xiangya Road 87, Changsha, 410008, Hunan, China.329544100@qq.com.

3 Department of Pediatrics, Xiangya Hospital, Central South University, Xiangya Road 87, Changsha, 410008, Hunan, China. pengjing4346@163.com.

*These authors contributed equally to this work and should be considered co-corresponding authors.

**Supplementary material**

**Fig. S1** shRNA knockdown efficiency in Neuro-2a cells. Western blotting showed that compared to control cells, the protein levels of the Taf1 protein were reduced in Neuro-2a cellsby almost 70% afterstableTaf1 knockdown. The TAF1 antibody (Cell Signaling Technology, Rabbit 1:1000) was used for measurement. Student’s t-test was applied to compare groups. All data are presented as mean ± standard error of the mean (SEM). The p-value was divided into three levels: *P < 0.05, **P < 0.005, ****P < 0.0001.
